# Supplementary material for: AAV-Mediated CRISPR/Cas9 Gene Editing in Murine Phenylketonuria
Source: PubMed Central journal article supplement — Mol Ther Methods Clin Dev. 2019 Dec 24;17:234–45. doi: 10.1016/j.omtm.2019.12.004 (PMC6962637; doi:10.1016/j.omtm.2019.12.004), 2019-12-24

**OMTM, Volume 17**

**Supplemental Information**

**AAV-Mediated CRISPR/Cas9 Gene**

**Editing in Murine Phenylketonuria**

**Daelyn Y. Richards, Shelley R. Winn, Sandra Dudley, Sean Nygaard, Taylor L. Mighell, Markus Grompe, and Cary O. Harding**

### **Supplementary Figure 1: Guide 1 Validation.**

**A. Surveyor Assay.** Gel electrophoresis of Surveyor Assay performed with Guide 1, 2, and 3, as indicated, with control uncut 800bp PCR target and flanking 100bp ladder. Guide 1 was the only guide showing any visible cutting of the target, as indicated. **B. Takara Guide-It Assay.** Gel electrophoresis of *in vitro* Guide-It Takara Assay performed with Guide 1, with 50bp ladder on the left and uncut 800bp substrate on the right. Again, RNP-Guide1 showed visible cutting of the target PCR substrate.

### **Supplementary Figure 2: NGS Selection and Validation.**

**A. SpCas9-Guide1 Target Sites.** Table of all COSMID produced *SpCas9*-Guide1 potential cutting sites. Yellow is on-target site, orange is off-target sites selected for further investigation. **B. NGS Read Uniformity.** Display of NGS read depth at every location investigated in every animal, indicating all samples were represented and no samples were dropped.

### **Supplementary Figure 3: dAAV+Van Breeders.**

**A. dAAV+Van Breeder Nesting.** Photograph of dAAV+Van breeder pair nesting. **B. *Pah*<sup>enu2</sup>/+ Breeder Nesting** *Pah*<sup>enu2</sup>/+ Breeder Nesting Photograph of heterozygous breeder pair nesting. **C. Female dAAV+Van Breeder.** Female dAAV+Van breeder animal at 65 weeks, with a dark fur coat and healthy mass of 29.2 grams. **D. Male dAAV+Van Breeder.** Male dAAV+Van breeder animal at 65 weeks, with a dark fur coat and obese mass of 40.7 grams.

**A. Surveyor Assay**

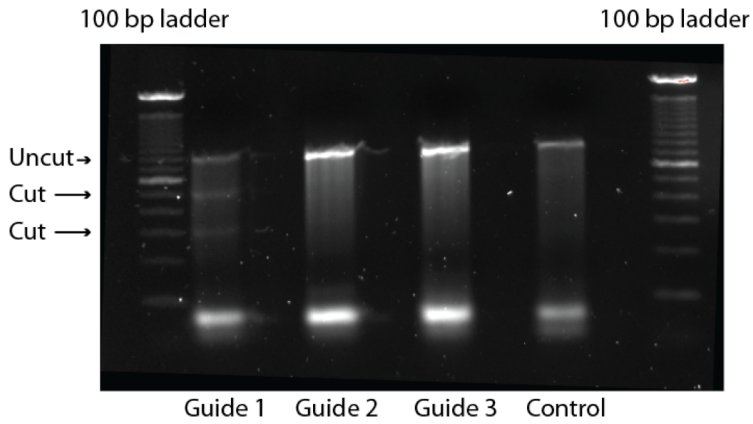

**B. Takara Guide-It Assay**

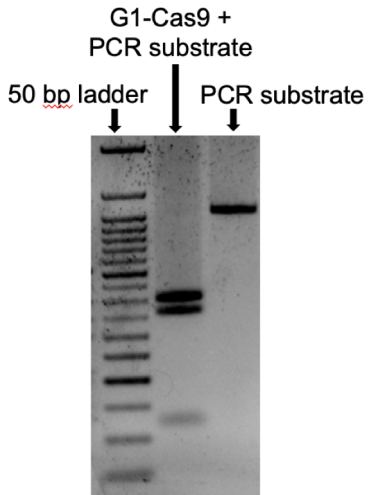

## A. COSMID Output

| Chr Position            | Strand | Cut site  | Score |
|-------------------------|--------|-----------|-------|
| Chr10:87570336-87570358 | -      | 87570342  | 0     |
| Chr3:62532887-62532909  | +      | 62532903  | 5.42  |
| ChrX:140587182-14058720 | -      | 140587188 | 2.93  |
| Chr17:78827214-78827236 | +      | 78827230  | 22.45 |
| ChrX:52428425-52428447  | +      | 52428441  | 11.19 |
| Chr10:116187078-1161871 | +      | 116187094 | 0.71  |
| Chr11:107380762-1073807 | -      | 107380768 | 9.27  |
| Chr1:193399721-19339974 | -      | 193399727 | 6.6   |
| Chr10:87570336-87570357 | -      | 87570342  | 0.63  |
| Chr10:116187079-1161871 | +      | 116187094 | 1.34  |
| Chr3:62532888-62532909  | +      | 62532903  | 5.93  |
| Chr10:87570336-87570357 | -      | 87570342  | 0.79  |
| Chr10:87570336-87570357 | -      | 87570342  | 0.96  |
| Chr7:71689783-71689804  | +      | 71689798  | 23.04 |
| Chr16:26312076-26312097 | +      | 26312091  | 8.78  |
| Chr18:59943710-59943731 | +      | 59943725  | 23.86 |
| Chr12:60323904-60323925 | +      | 60323919  | 1.33  |
| Chr4:69351258-69351279  | +      | 69351273  | 7.11  |
| Chr13:48943433-48943454 | -      | 48943439  | 5.6   |
| Chr18:52791504-52791525 | -      | 52791510  | 7.11  |
| Chr12:99734046-99734067 | -      | 99734052  | 11.41 |
| Chr19:32989811-32989832 | +      | 32989826  | 5.93  |
| Chr10:11174367-11174388 | -      | 11174373  | 6.16  |
| Chr11:81943011-81943032 | +      | 81943026  | 7.08  |
| Chr5:93684753-93684774  | +      | 93684768  | 10.01 |
| Chr5:93948467-93948488  | -      | 93948473  | 10.01 |
| Chr5:94140055-94140076  | -      | 94140061  | 10.01 |
| Chr5:94457664-94457685  | -      | 94457670  | 10.01 |
| Chr5:95614290-95614311  | -      | 95614296  | 10.01 |
| Chr5:95755669-95755690  | -      | 95755675  | 10.01 |
| Chr10:87570337-87570358 | -      | 87570343  | 30.51 |
| Chr10:87570337-87570358 | -      | 87570343  | 26.51 |
| Chr10:87570337-87570358 | -      | 87570343  | 40.51 |
| Chr10:87570337-87570358 | -      | 87570343  | 20.51 |
| Chr10:116187078-1161870 | +      | 116187093 | 21.22 |
| Chr10:87570336-87570359 | -      | 87570342  | 0.95  |
| Chr10:87570336-87570359 | -      | 87570342  | 0.97  |
| Chr10:87570336-87570359 | -      | 87570342  | 1.14  |
| Chr13:37361079-37361102 | +      | 37361096  | 3.89  |
| Chr12:57512651-57512674 | -      | 57512657  | 3.67  |
| Chr7:5484550-5484573    | -      | 5484556   | 7.23  |
| Chr14:72236511-72236534 | +      | 72236528  | 7.72  |
| Chr10:87570335-87570358 | -      | 87570341  | 32.7  |
| Chr17:78827214-78827237 | +      | 78827231  | 23.15 |
| Chr10:87570335-87570358 | -      | 87570341  | 40.7  |
| Chr10:87570335-87570358 | -      | 87570341  | 40.7  |

## B. NGS Read Uniformity

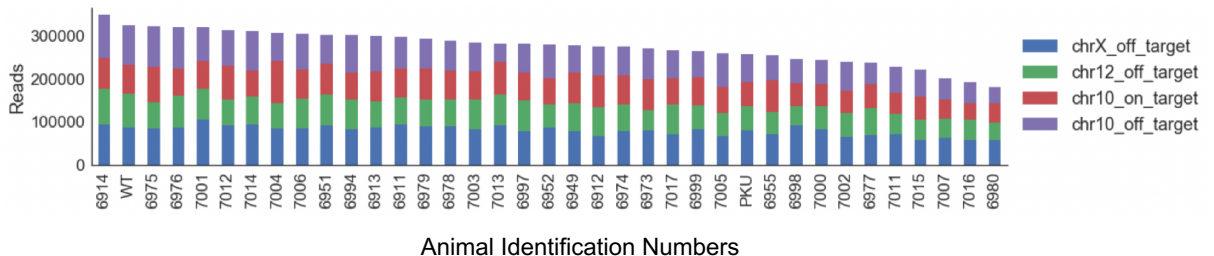



**A. dAAV+Van Breeder Nesting**

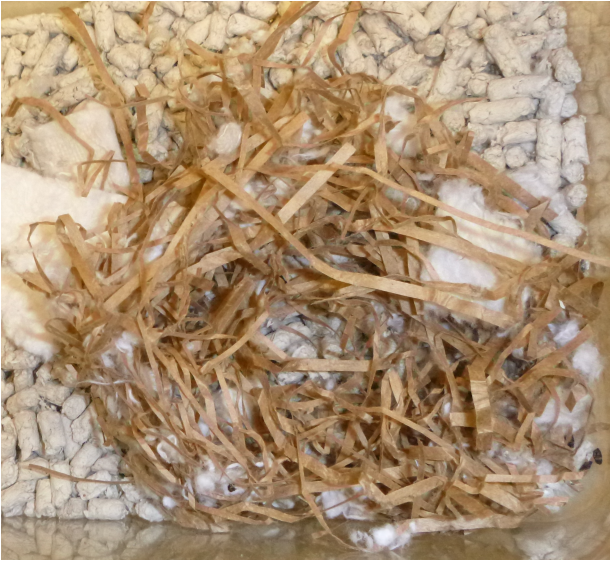

**B. *Pah<sup>enu2/+</sup>* Breeder Nesting**

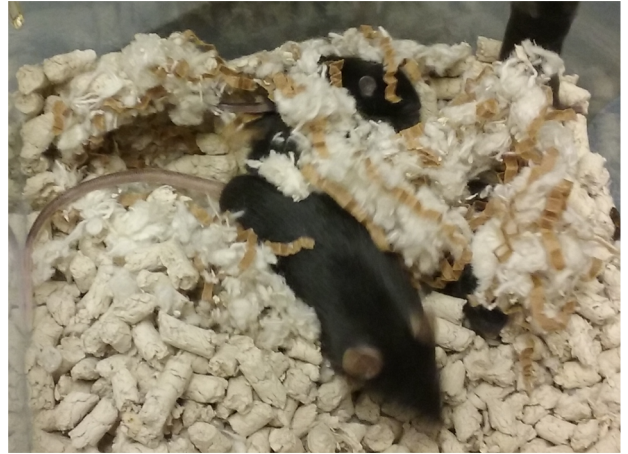

**C. Female breeder at 65 weeks**

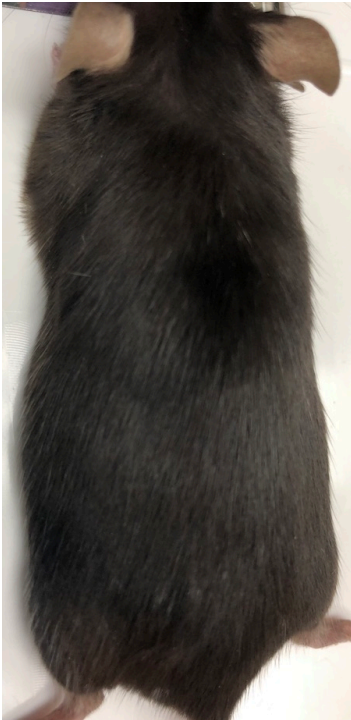

**D. Male breeder at 65 weeks**

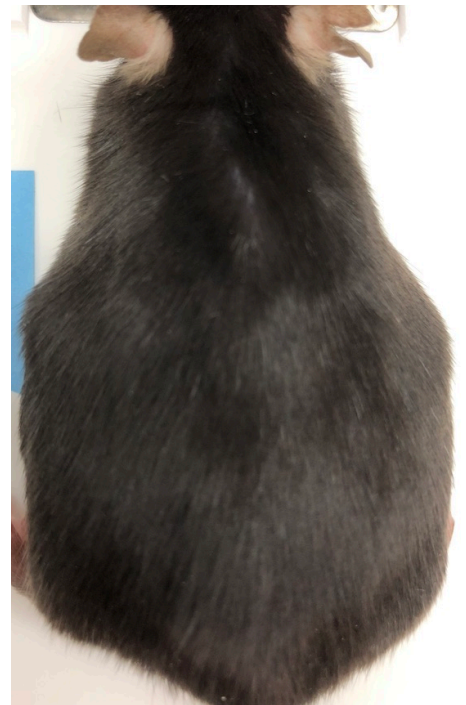

Supplement: mmc1.pdf [file mmc1.pdf]
